# Supplementary material
Source: PubMed Central journal article supplement (PMC8005492)

(A)

| Cluster:  | Transcription Factors Bound          | 1 <sup>st</sup> motif<br>% (positive/total sites) | 2 <sup>nd</sup> motif<br>% (positive/total sites) |
|-----------|--------------------------------------|---------------------------------------------------|---------------------------------------------------|
| Cluster 1 | FOXF1 alone                          |                                                   |                                                   |
|           |                                      | Sites: <b>81.5%</b> (4834/5931)                   | Sites: <b>19.1%</b> (1135/5931)                   |
|           |                                      | E-value: 1.6E-1442                                | E-value: 1.1E-93                                  |
| Cluster 2 | FOXF1<br>PAX3/FOXO1                  |                                                   |                                                   |
|           |                                      | Sites: <b>73.6%</b> (1536/2087)                   | Sites: <b>18.1%</b> (378/2087)                    |
|           |                                      | E-value: 1.5E-410                                 | E-value: 1.9E-67                                  |
| Cluster 3 | FOXF1<br>MYOD1                       |                                                   |                                                   |
|           |                                      | Sites: <b>92.5%</b> (433/468)                     | Sites: <b>20.7%</b> (97/468)                      |
|           |                                      | E-value: 9.5E-444                                 | E-value: 5.4E-52                                  |
| Cluster 4 | FOXF1<br>MYOG                        |                                                   |                                                   |
|           |                                      | Sites: <b>83.1%</b> (709/853)                     | Sites: <b>22.3%</b> (190/853)                     |
|           |                                      | E-value: 4.3E-571                                 | E-value: 2.0E-112                                 |
| Cluster 5 | FOXF1<br>PAX3/FOXO1<br>MYOD1         |                                                   |                                                   |
|           |                                      | Sites: <b>89.6%</b> (207/231)                     | Sites: <b>29.4%</b> (68/231)                      |
|           |                                      | E-value: 1.2E-126                                 | E-value: 1.7E-15                                  |
| Cluster 6 | FOXF1<br>PAX3/FOXO1<br>MYOG          |                                                   |                                                   |
|           |                                      | Sites: <b>55.3%</b> (472/853)                     | Sites: <b>36.5%</b> (311/853)                     |
|           |                                      | E-value: 8.9e-173                                 | E-value: 5.7e-240                                 |
| Cluster 7 | FOXF1<br>MYOD1<br>MYOG               |                                                   |                                                   |
|           |                                      | Sites: <b>90.7%</b> (1007/1110)                   | Sites: <b>42.1%</b> (467/1110)                    |
|           |                                      | E-value: 1.5E-802                                 | E-value: 1.2E-280                                 |
| Cluster 8 | FOXF1<br>PAX3/FOXO1<br>MYOD1<br>MYOG |                                                   |                                                   |
|           |                                      | Sites: <b>59.3%</b> (957/1615)                    | Sites: <b>43.6%</b> (704/1615)                    |
|           |                                      | E-value: 2.7E-367                                 | E-value: 2.1E-340                                 |

(B)

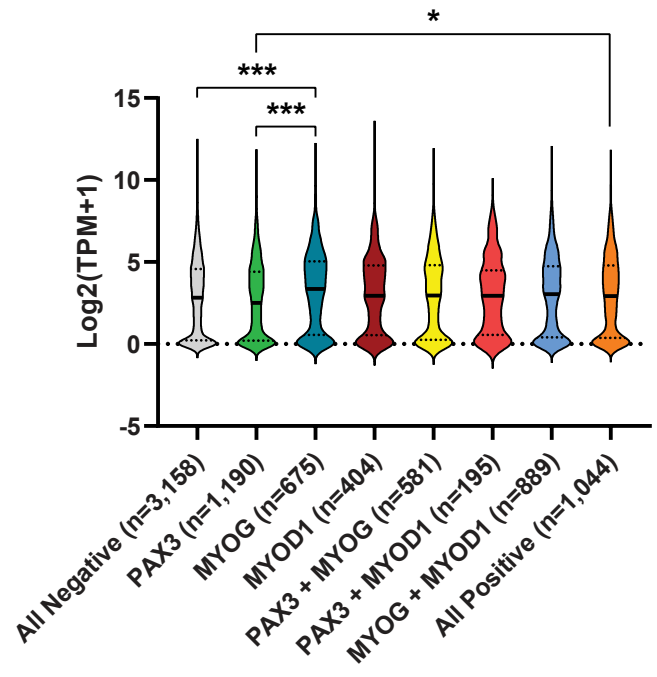

(C)

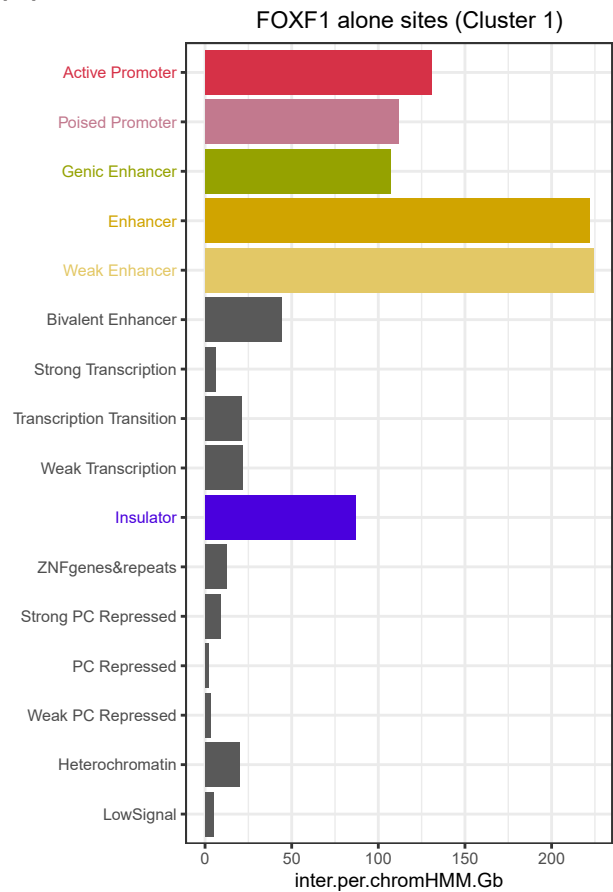

Supplement: NIHMS1669194-supplement-15.pdf [file NIHMS1669194-supplement-15.pdf]
