# Supplementary material
Source: PubMed Central journal article supplement (PMC8005492)

(A)

| PDX          | Patient I.D. | Histology          | Anatomical Location            | Prior Therapy | Genomics   |
|--------------|--------------|--------------------|--------------------------------|---------------|------------|
| FN-RMS PDX 1 | SARC 160718  | Spindle/sclerosing | Bicep                          | Y             | Unknown    |
| FN-RMS PDX 2 | SARC 171030  | Embryonal          | Lymph node adjacent to stomach | Y             | NRAS       |
| FN-RMS PDX 3 | SARC 180612  | Embryonal          | Nasal cavity                   | Y             | NRAS       |
| FP-RMS PDX 1 | SARC 170206  | Alveolar           | Cheek                          | Y             | PAX3/FOXO1 |
| FP-RMS PDX 2 | SARC 170503  | Alveolar           | Bone Marrow                    | N             | PAX3/FOXO1 |
| FP-RMS PDX 3 | SARC 180409  | Alveolar           | Chest Wall                     | N             | PAX3/FOXO1 |
| FP-RMS PDX 4 | SARC 180605  | Alveolar           | Parameningeal                  | N             | PAX3/FOXO1 |

(B)

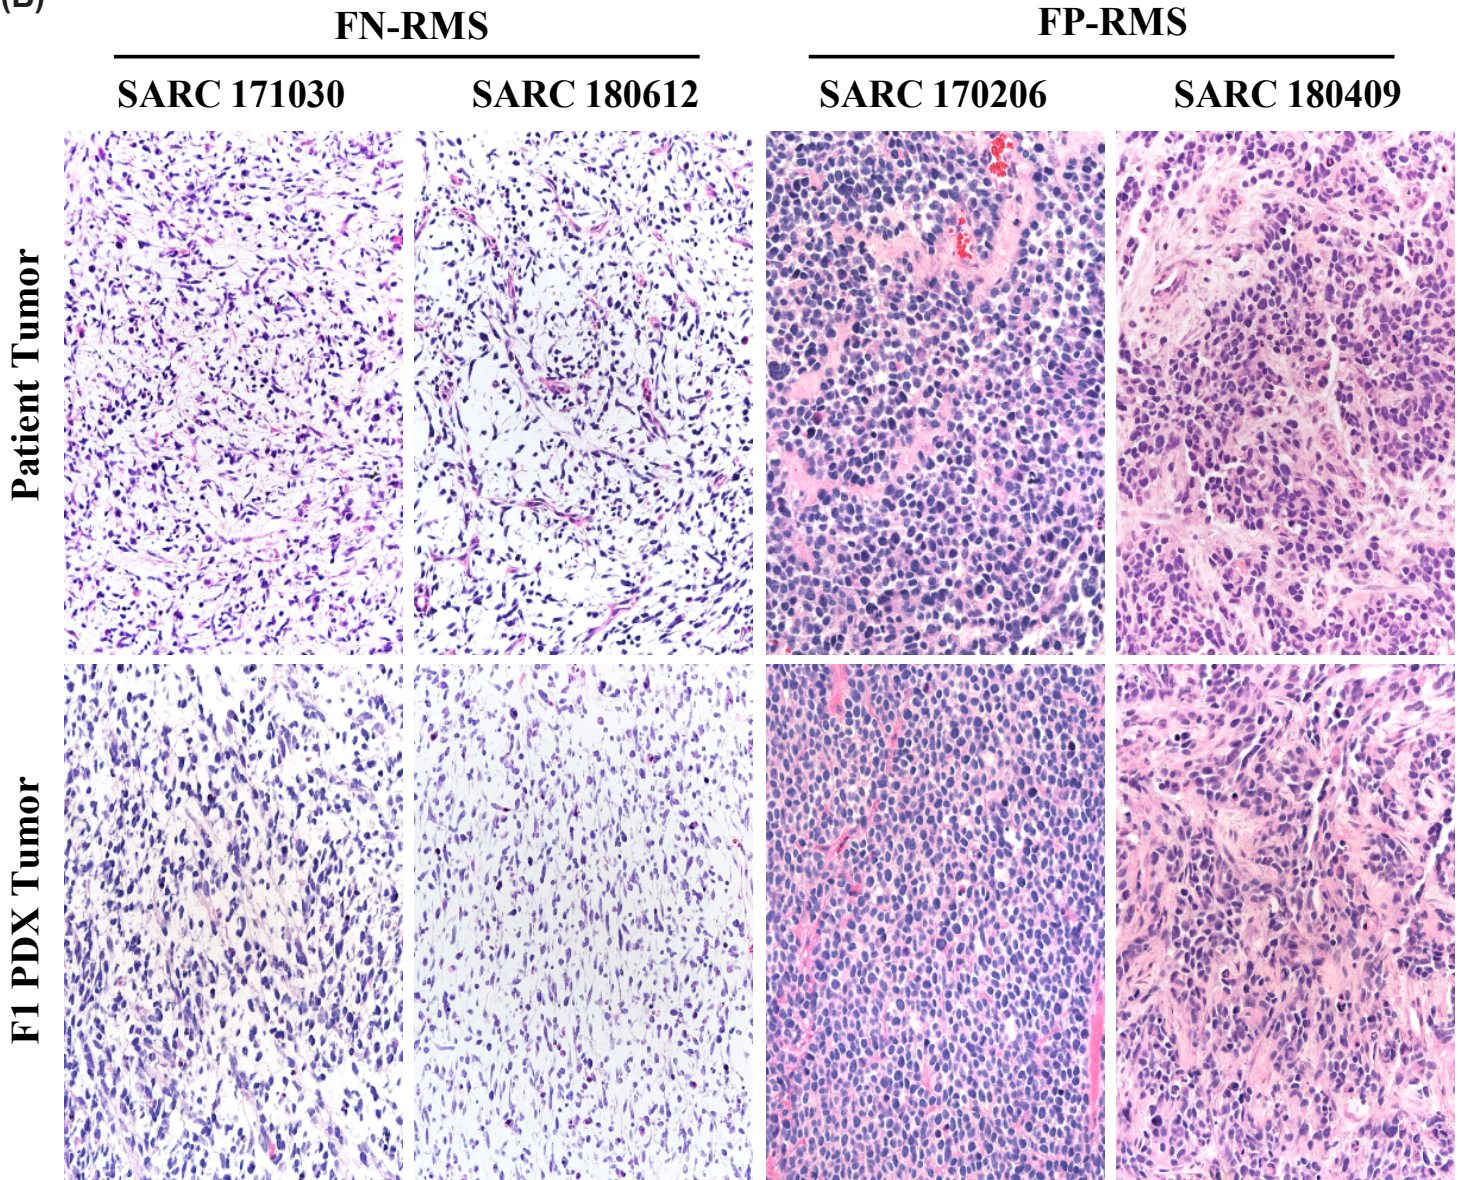

Supplement: NIHMS1669194-supplement-2.pdf [file NIHMS1669194-supplement-2.pdf]
