# Supplementary material
Source: PubMed Central journal article supplement (PMC8005492)

(A)

**Fusion Negative RMS Xenografts**

Embryonal

Spindle/Sclerosing

**RD**

**PDX 1**

**PDX 2**

**PDX 1**

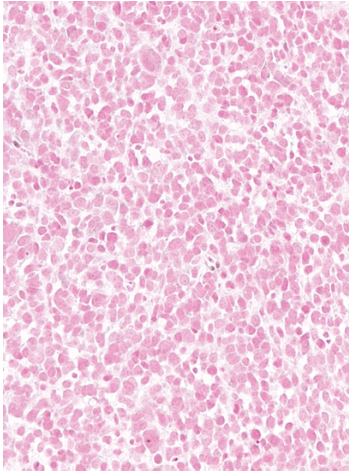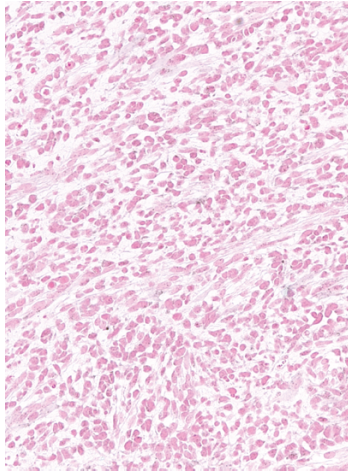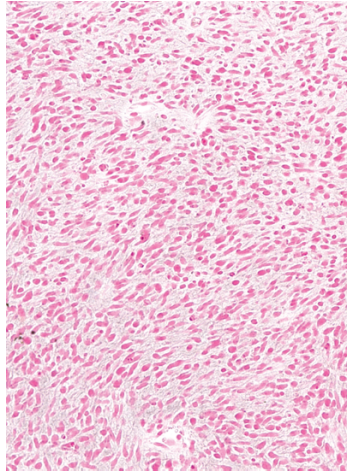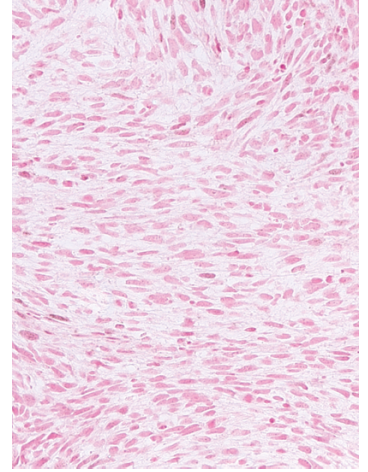

(B)

**Fusion Positive RMS Xenografts**

**RH30**

**RH18**

**RH4**

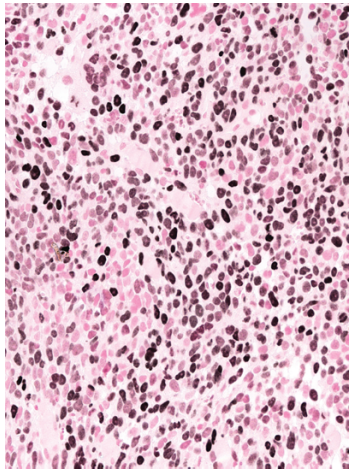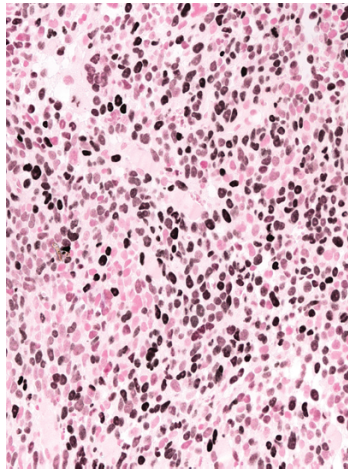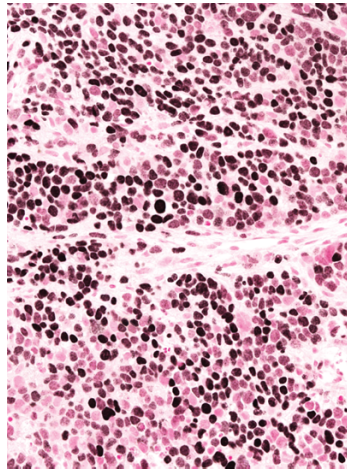

**PDX 1**

**PDX 2**

**PDX 3**

**PDX 4**

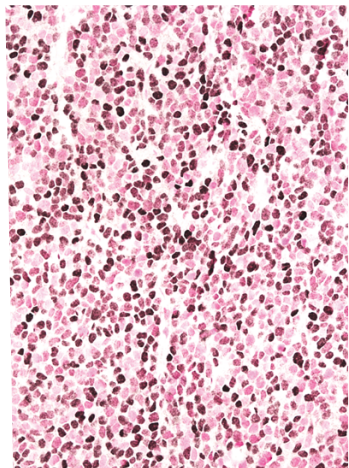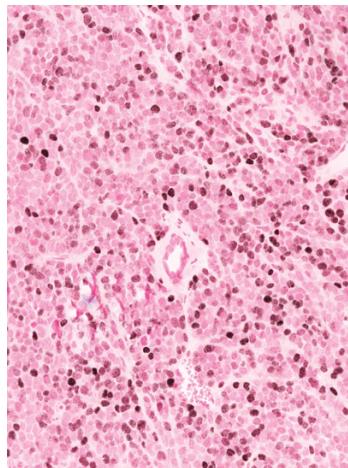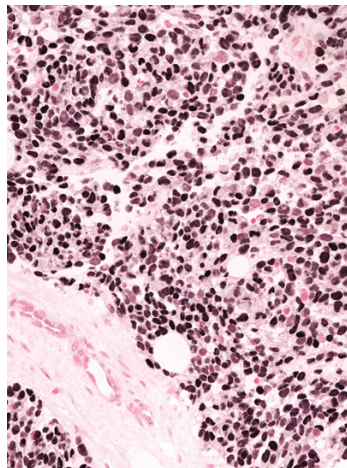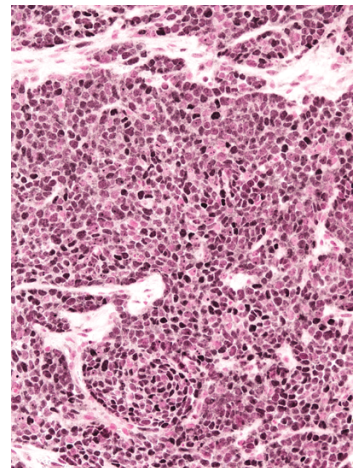

Supplement: NIHMS1669194-supplement-3.pdf [file NIHMS1669194-supplement-3.pdf]
