# Supplementary material
Source: PubMed Central journal article supplement (PMC8005492)
Supplement: NIHMS1669194-supplement-7.pdf [file NIHMS1669194-supplement-7.pdf]

(A)

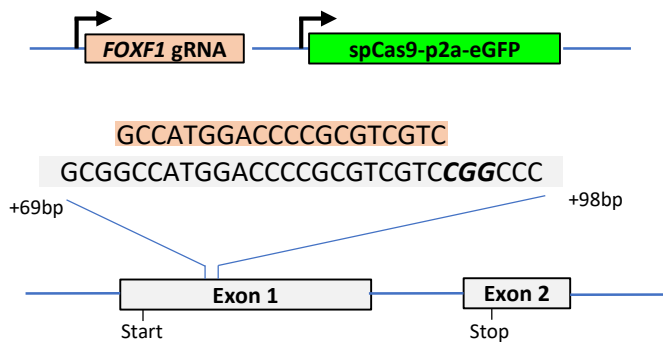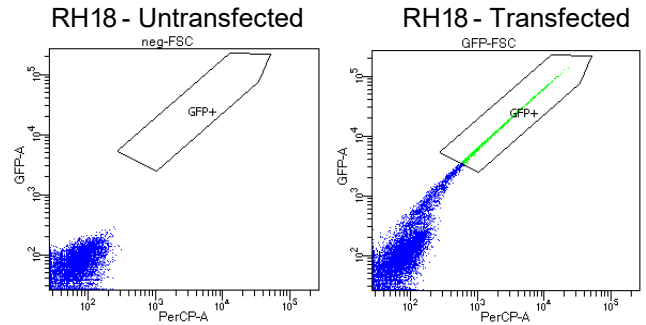

Transient transfection of RH18 with gRNA/Cas9/GFP plasmid

GFP+

Single Cell plating

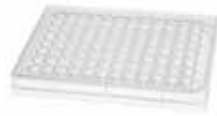

4 x 96 well plates

186 single-cell wells

Expand

Screen by Western/ Sequencing

10 clones

(B)

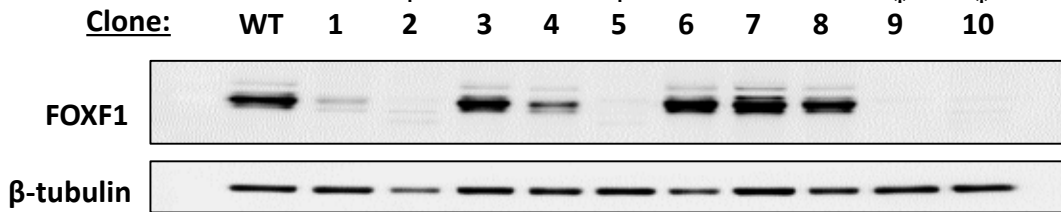

(C)

| Clone       | FOXF1 Allele (3 total) | Mutation                                                                                                  | Predicted effect on protein |
|-------------|------------------------|-----------------------------------------------------------------------------------------------------------|-----------------------------|
| KO clone 2  | 1                      | c.-4_+109del.                                                                                             | Frameshift                  |
|             | 2                      | c.88_94del.                                                                                               | Frameshift                  |
|             | 3                      | c.70_86del.                                                                                               | Frameshift                  |
| KO clone 5  | 1                      | c.88_89insT                                                                                               | Frameshift                  |
|             | 2                      | c.-13_+20del.;<br>c.53_62.del;c.64G>A;c.67G>A;<br>c.77_82del.; c.87G>A;<br>c.88_92del.; c.98C>A; c.99del. | Frameshift                  |
|             | 3                      | c.83_117del.                                                                                              | Frameshift                  |
| KO clone 9  | 1                      | c.87insA                                                                                                  | Frameshift                  |
|             | 2                      | c.87insT                                                                                                  | Frameshift                  |
|             | 3                      | c.87insG                                                                                                  | Frameshift                  |
| KO clone 10 | 1                      | c.33-94 deletion                                                                                          | Frameshift                  |
|             | 2                      | c.87 del.                                                                                                 | Frameshift                  |
|             | 3                      | Unknown                                                                                                   | Unknown                     |
