# Supplementary material
Source: PubMed Central journal article supplement (PMC8005492)
Supplement: NIHMS1669194-supplement-11.pdf [file NIHMS1669194-supplement-11.pdf]

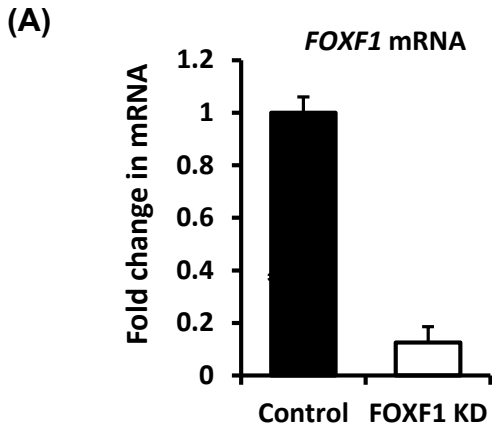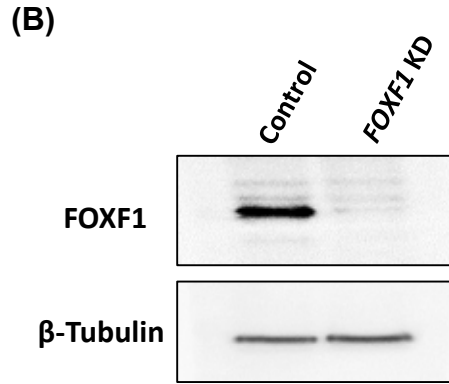

(C) Downregulated genes

| Gene ID             | Gene Description                         | Control (TPM) | FOXF1 KD (TPM) | EBseq Results |                                        |
|---------------------|------------------------------------------|---------------|----------------|---------------|----------------------------------------|
|                     |                                          |               |                | Fold change   | P-Value                                |
| <i>ART3</i>         | ADP-ribosyltransferase 3                 | 26.26         | 3.47           | -6.46         | $P < 1.10E^{-17}$                      |
| <b><i>FOXF1</i></b> | <b>Forkhead box F1</b>                   | <b>76.94</b>  | <b>12.92</b>   | <b>-5.47</b>  | <b><math>P &lt; 1.10E^{-17}</math></b> |
| <i>MMP3</i>         | Matrix metalloproteinase-3               | 258.75        | 50.2           | -4.74         | $P < 1.10E^{-17}$                      |
| <i>MAGED4B</i>      | MAGE family member D4B                   | 78.14         | 15.39          | -4.69         | $P < 1.10E^{-17}$                      |
| <i>RMST</i>         | Rhabdomyosarcoma 2 associated transcript | 22.98         | 5.36           | -4.07         | $P = 8.26E^{-13}$                      |
| <i>FGF7</i>         | Fibroblast growth factor 7               | 25.06         | 8.11           | -2.84         | $P = 6.50E^{-11}$                      |
| <i>RXRG</i>         | Re noid X receptor gamma                 | 65.25         | 20.99          | -2.79         | $P = 5.51E^{-11}$                      |
| <i>DOCK10</i>       | Dedicator of cytokinesis 10              | 22.42         | 7.36           | -2.54         | $P = 1.84E^{-08}$                      |
| <i>VGLL2</i>        | Ves gial like family member 2            | 51.09         | 20.14          | -2.38         | $P = 4.63E^{-07}$                      |
| <i>TFAP2B</i>       | Transcrip on factor AP-2beta             | 18.64         | 8.92           | -1.92         | $P = 1.9E^{-03}$                       |

(D) Upregulated genes

| Gene ID      | Gene Description                                           | Control (TPM) | FOXF1 KD (TPM) | EBseq Results |                   |
|--------------|------------------------------------------------------------|---------------|----------------|---------------|-------------------|
|              |                                                            |               |                | Fold change   | P-Value           |
| <i>MYL1</i>  | Myosin light chain 1                                       | 35.15         | 192.48         | +5.87         | $P < 1.10E^{-17}$ |
| <i>DMBT1</i> | Deleted in malignant brain tumors 1                        | 4.11          | 19.16          | +4.97         | $P < 1.10E^{-17}$ |
| <i>TNNC1</i> | Troponin C1, slow skeletal and cardiac type                | 9.1           | 33.77          | +4.01         | $P = 2.17E^{-10}$ |
| <i>MYBPH</i> | Myosin binding protein H                                   | 10.1          | 22.53          | +4.01         | $P = 6.96E^{-06}$ |
| <i>MYLPF</i> | Myosin light chain, phosphorylatable, fast skeletal muscle | 30.54         | 104.62         | +3.73         | $P = 4.88E^{-15}$ |
| <i>TNNI1</i> | Troponin I1, slow skeletal type                            | 82.24         | 253.53         | +3.01         | $P = 1.37E^{-13}$ |
| <i>TNNC2</i> | Troponin C2, fast skeletal type                            | 18.91         | 41.04          | +2.36         | $P = 3.25E^{-04}$ |
| <i>AGRN</i>  | Agrin                                                      | 11            | 23.54          | +2.32         | $P = 3.46E^{-07}$ |
