# Supplementary material
Source: PubMed Central journal article supplement (PMC8005492)
Supplement: NIHMS1669194-supplement-12.pdf [file NIHMS1669194-supplement-12.pdf]

(A)

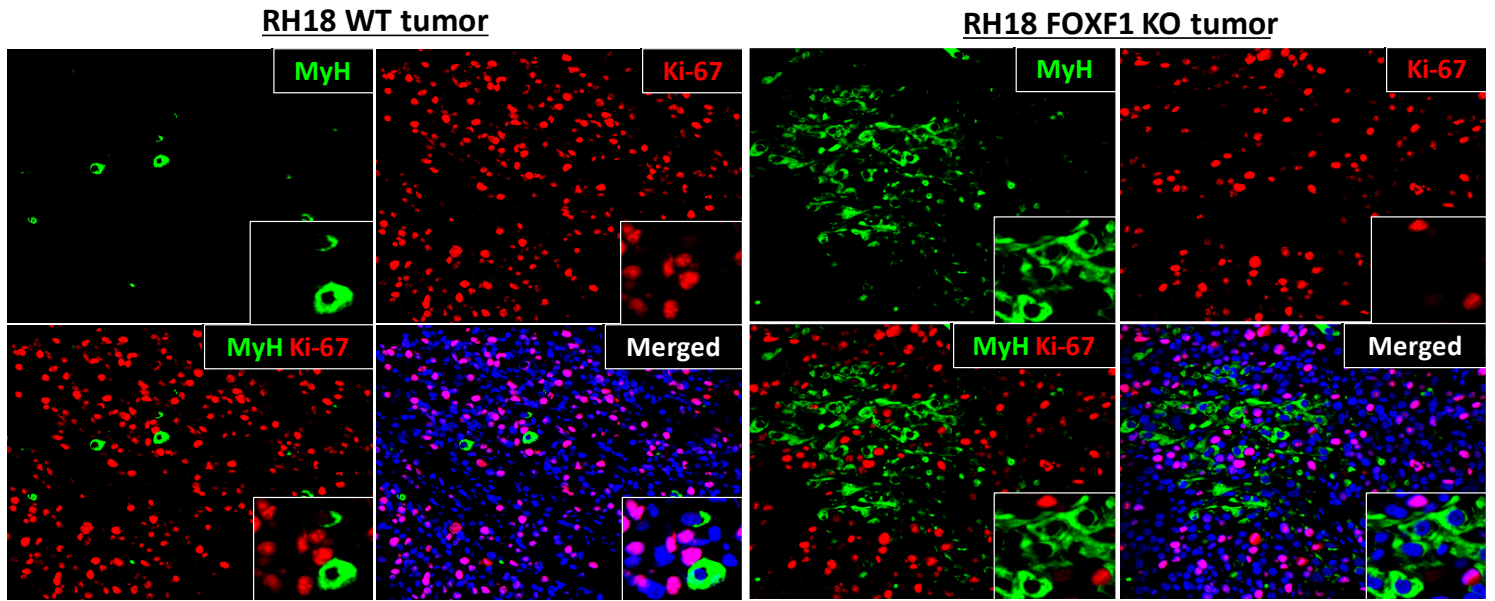

(B)

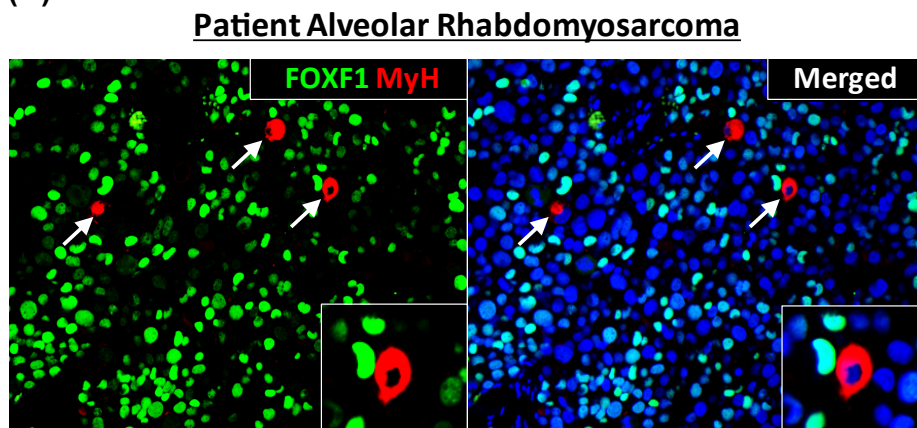

(C)

**FOXF1 expression after differentiation in orthotopic xenografts**

| Tumor Model | % [(MyH <sup>+</sup> FOXF1 <sup>+</sup> )/MyH <sup>+</sup> ] |
|-------------|--------------------------------------------------------------|
| RH4         | 0% [0/54]                                                    |
| RH18        | 0.0143% [1/70]                                               |
| RH30        | MyH not detected                                             |
| aRMS PDX 1  | 0% [0/16]                                                    |
| aRMS PDX 2  | 0% [0/46]                                                    |
| aRMS PDX 3  | 0% [0/16]                                                    |
| aRMS PDX 4  | 0% [0/27]                                                    |
