# Supplementary material
Source: PubMed Central journal article supplement (PMC8005492)

(A)

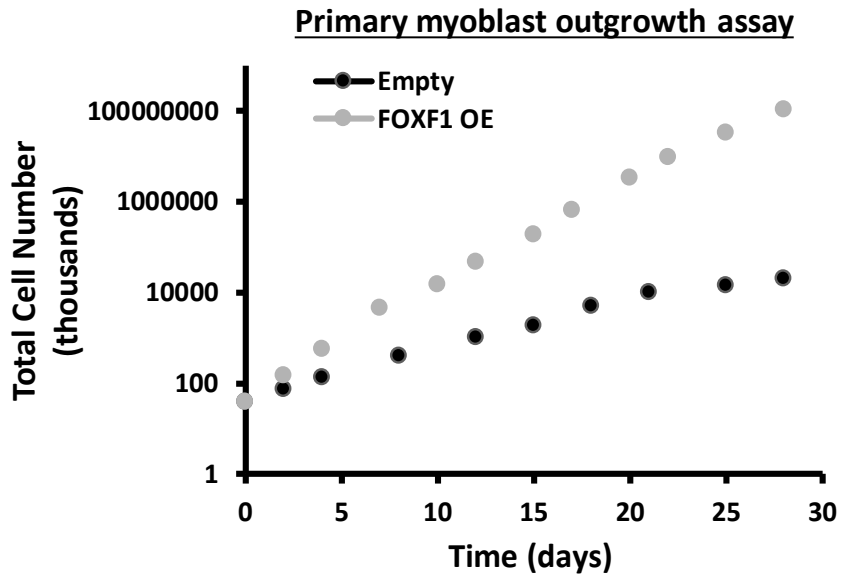

(B)

**Human Skeletal Muscle Myoblasts**

Growth Media

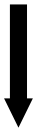

After 6 days in differentiation media

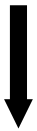

After 2 days returned to growth media

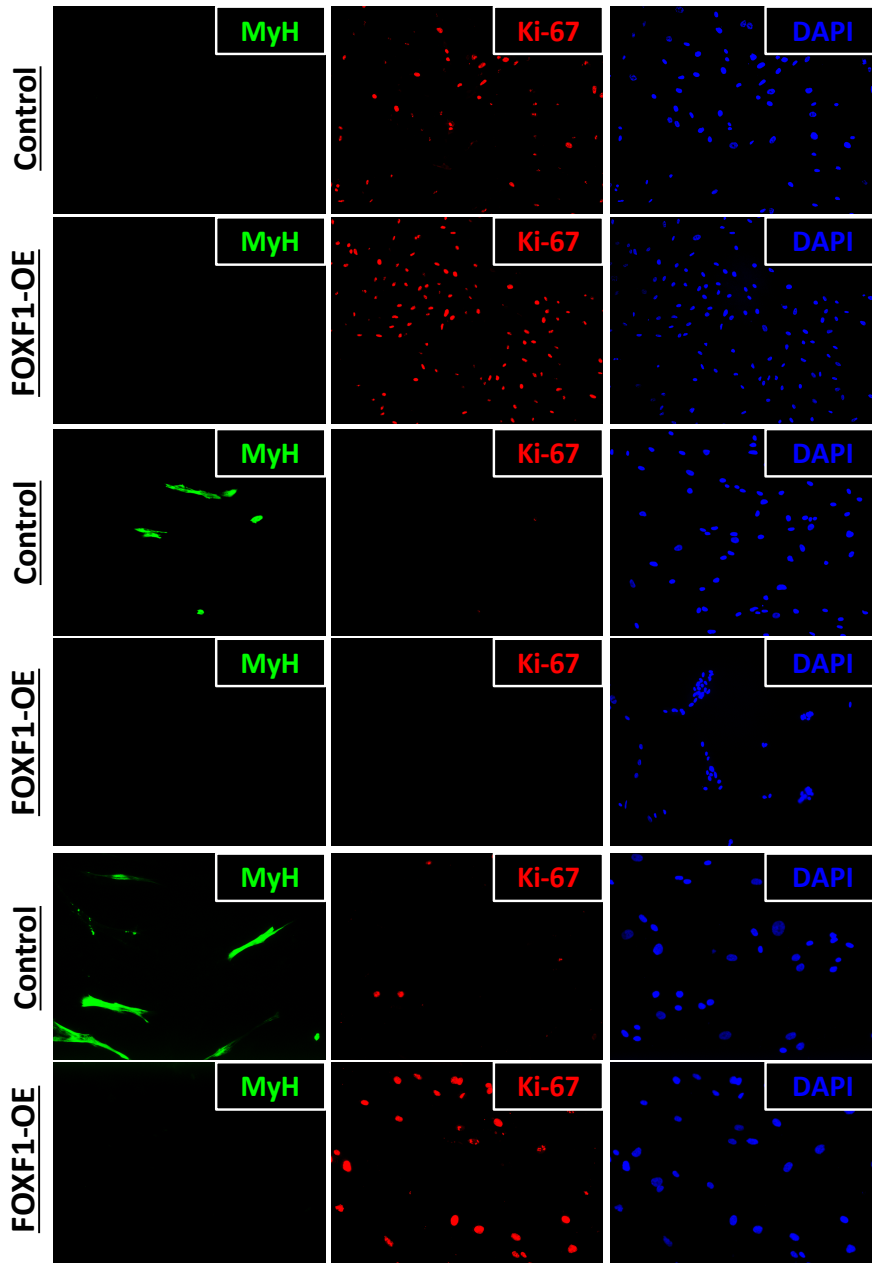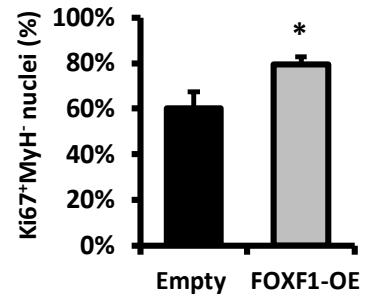

No Ki67<sup>+</sup> Detected

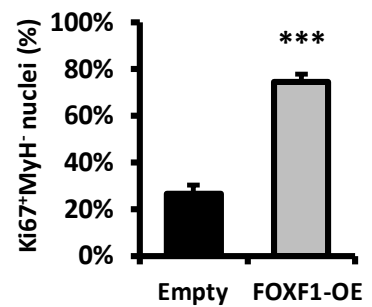

Supplement: NIHMS1669194-supplement-13.pdf [file NIHMS1669194-supplement-13.pdf]
