# Supplementary material
Source: PubMed Central journal article supplement (PMC8005492)

(A)

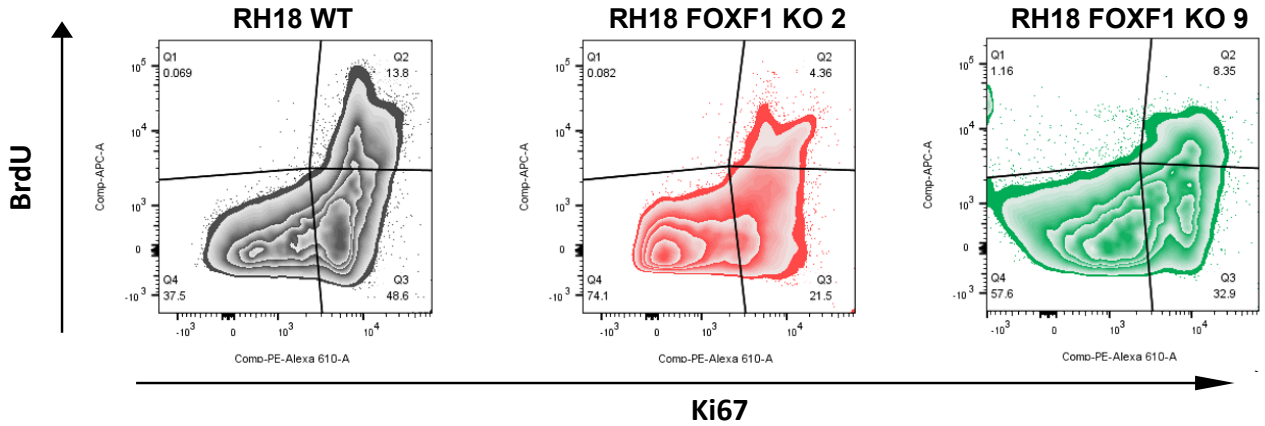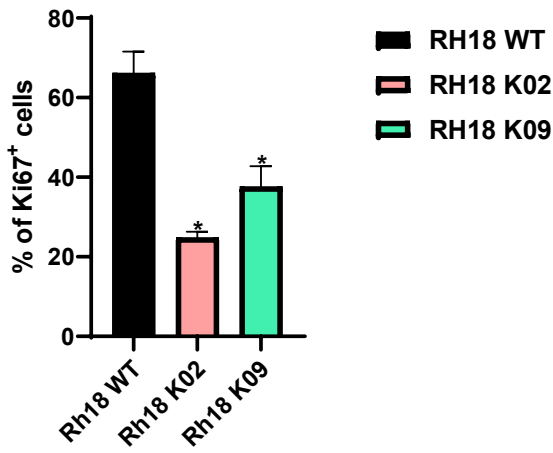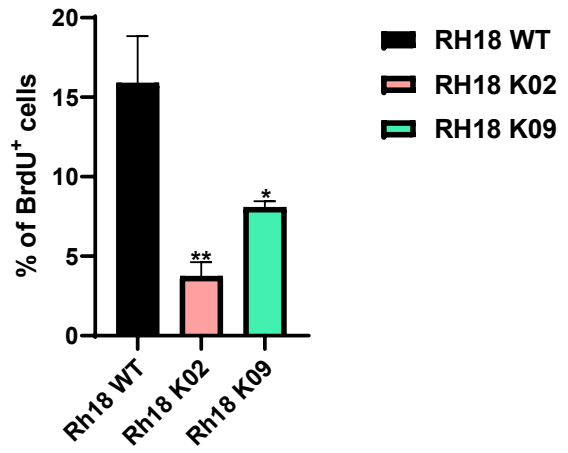

(B)

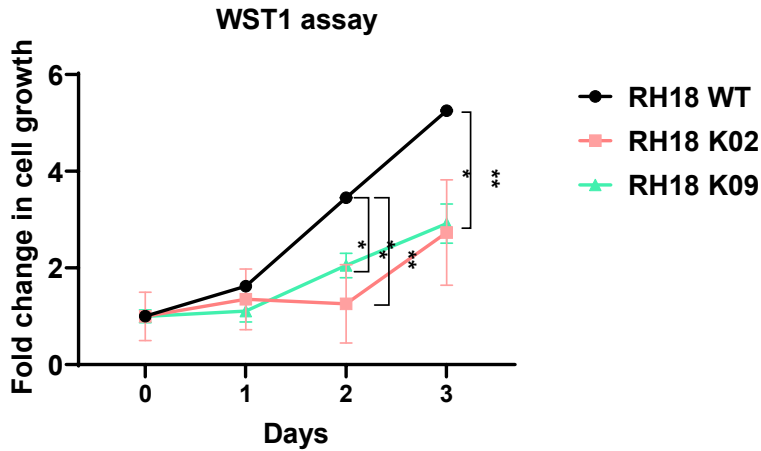

Supplement: NIHMS1669194-supplement-10.pdf [file NIHMS1669194-supplement-10.pdf]

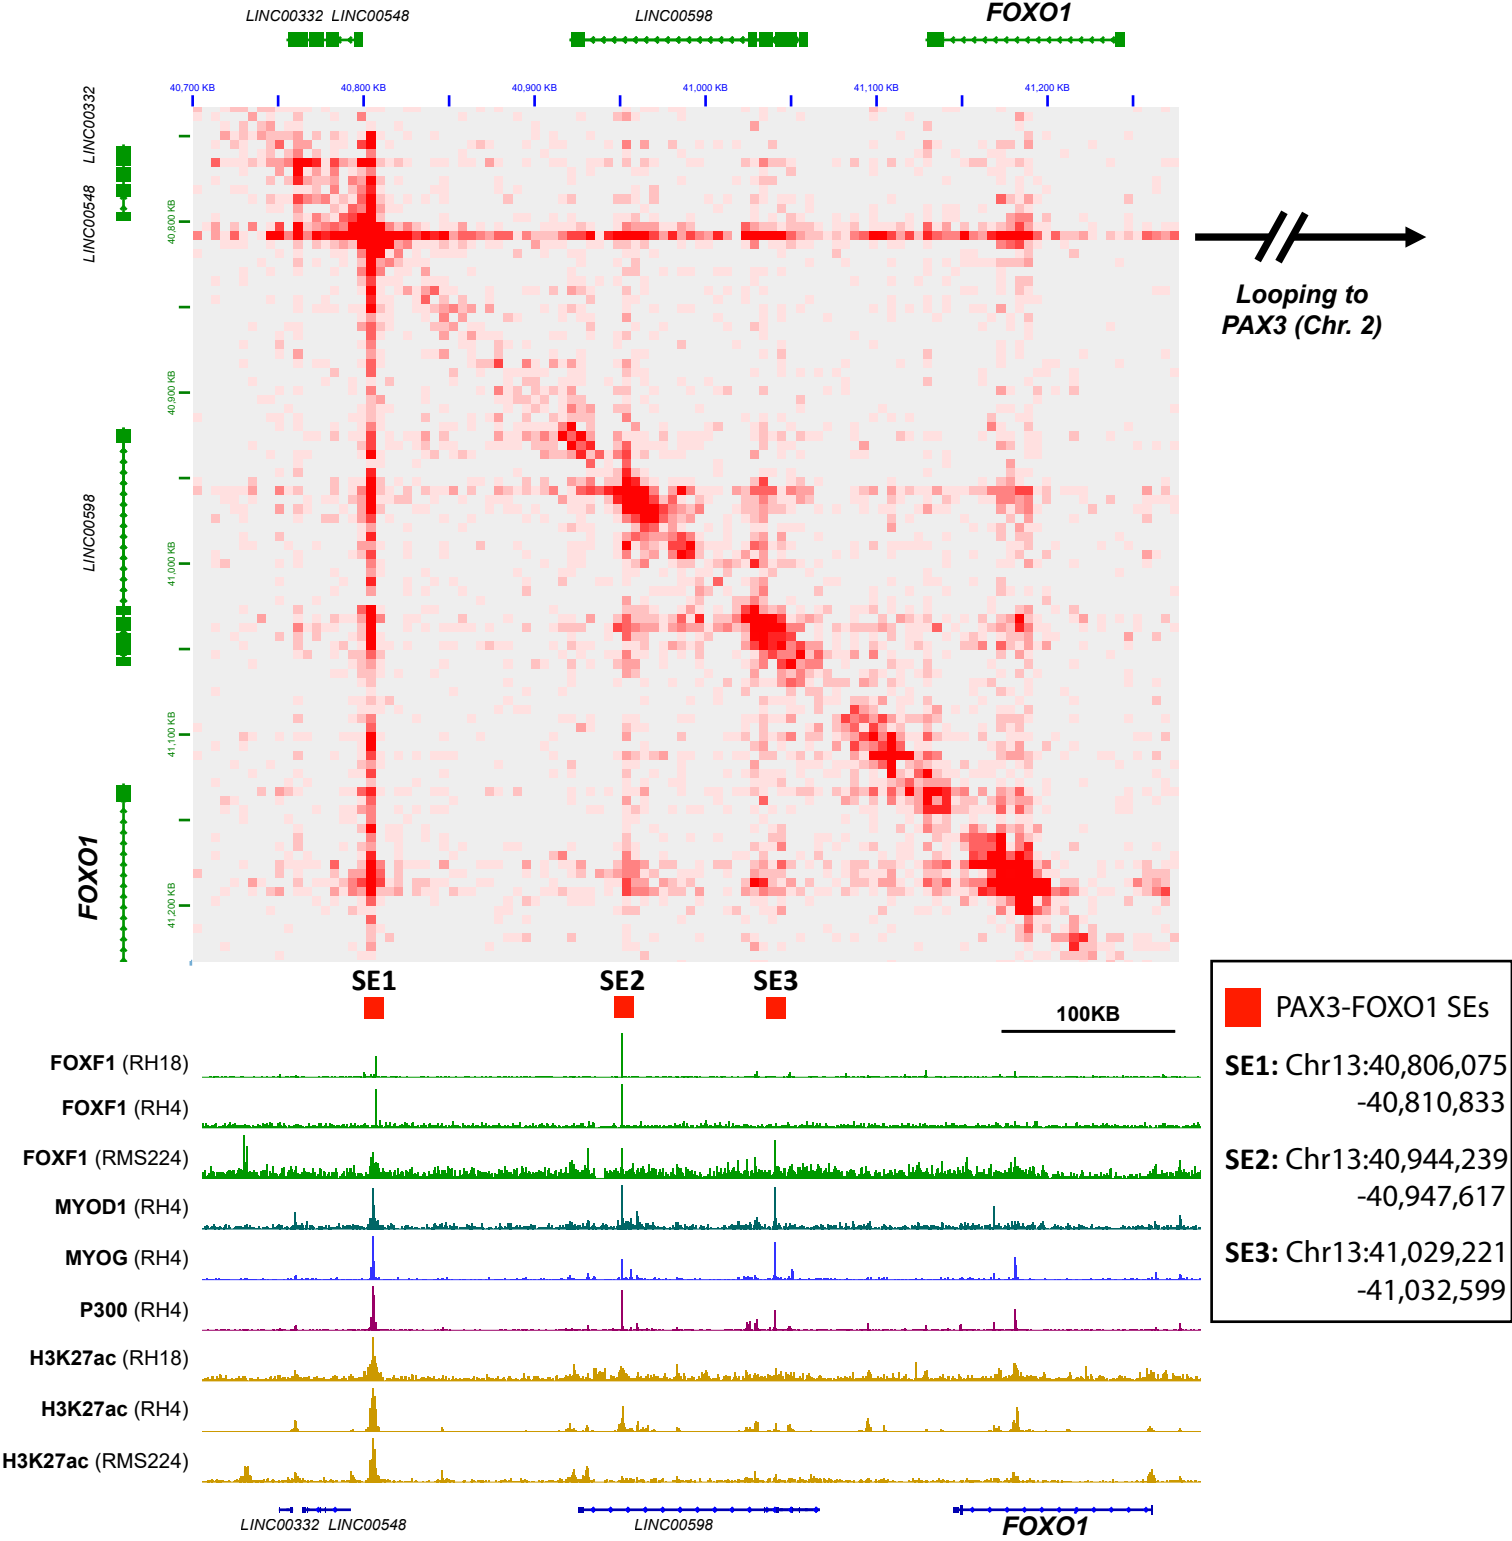

Supplement: NIHMS1669194-supplement-16.pdf [file NIHMS1669194-supplement-16.pdf]

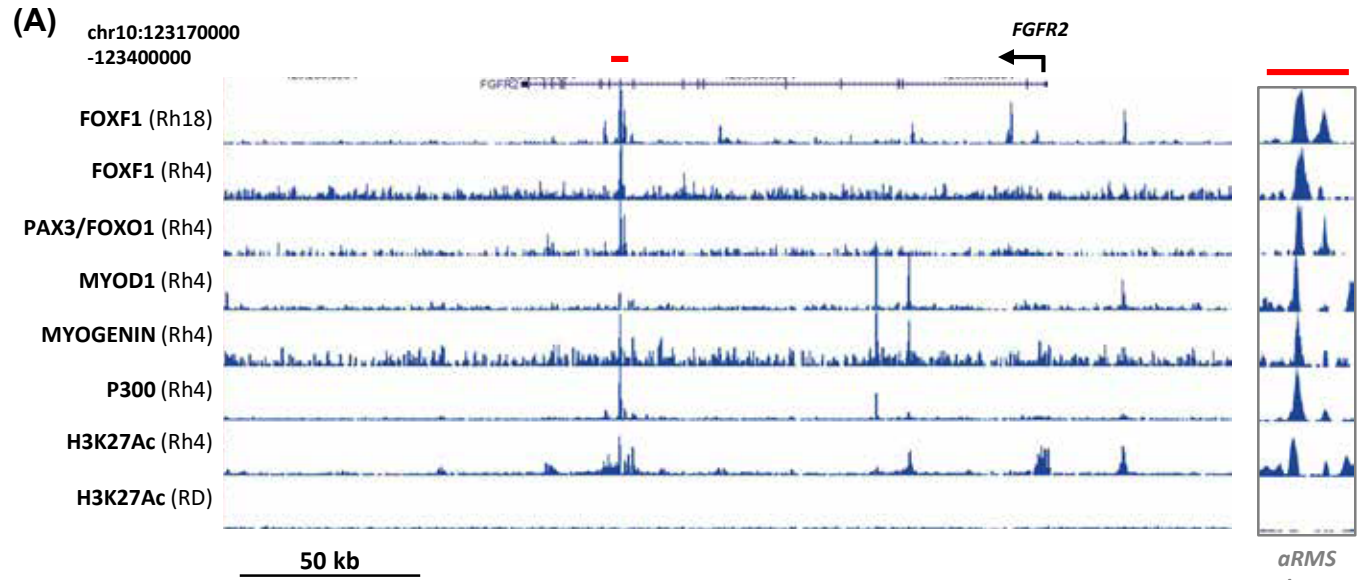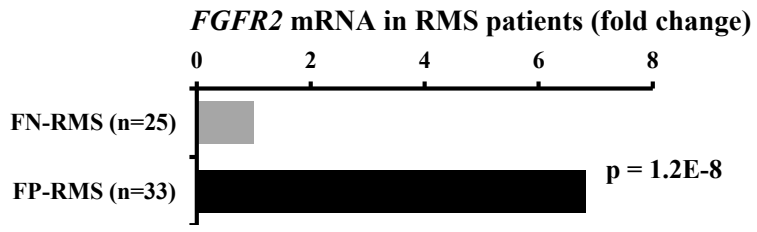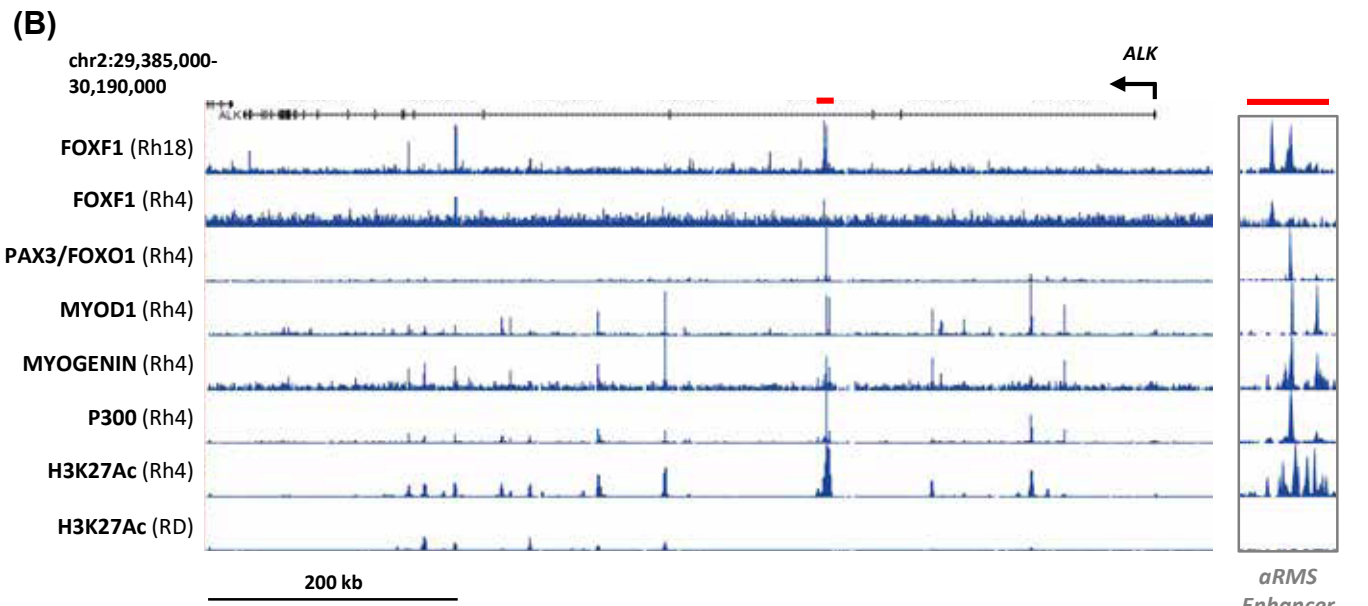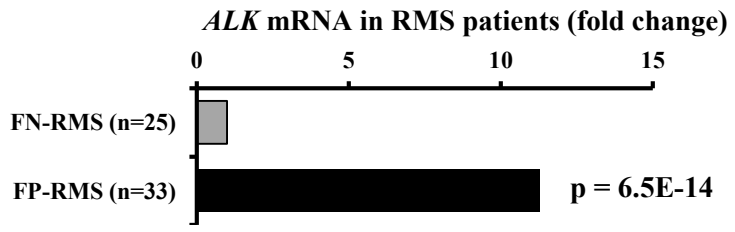

Supplement: NIHMS1669194-supplement-17.pdf [file NIHMS1669194-supplement-17.pdf]

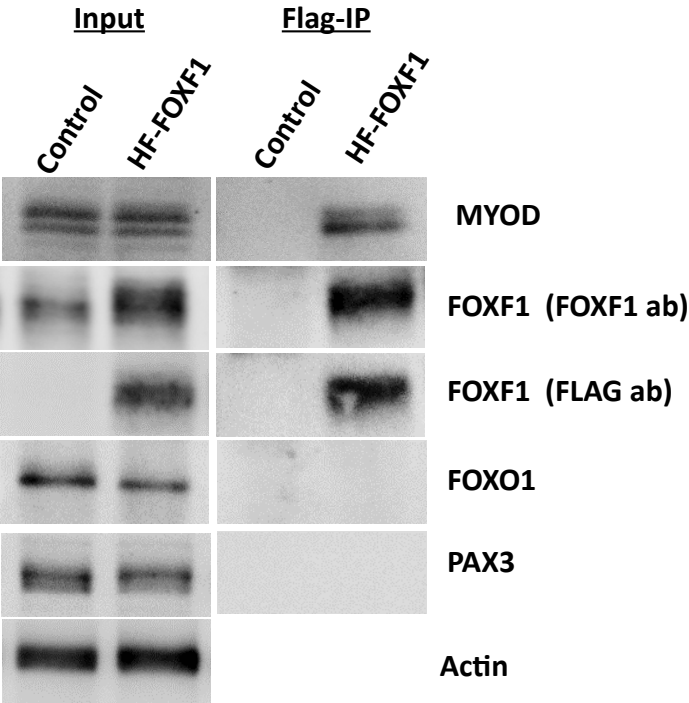

Supplement: NIHMS1669194-supplement-18.pdf [file NIHMS1669194-supplement-18.pdf]

### H3K27ac ChIPseq at FOXF1 gene locus

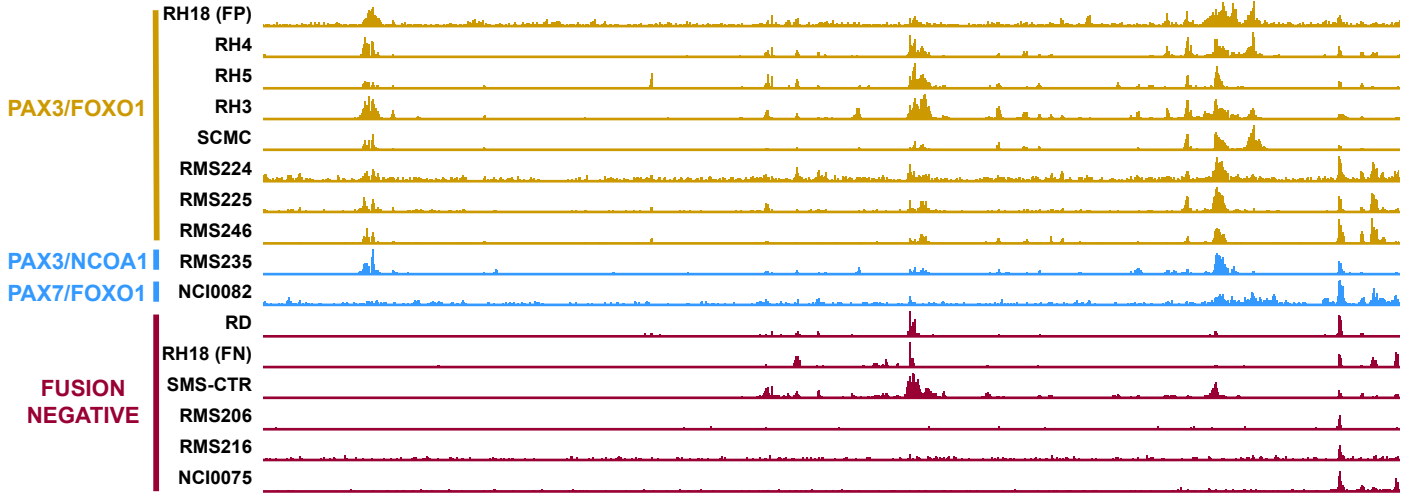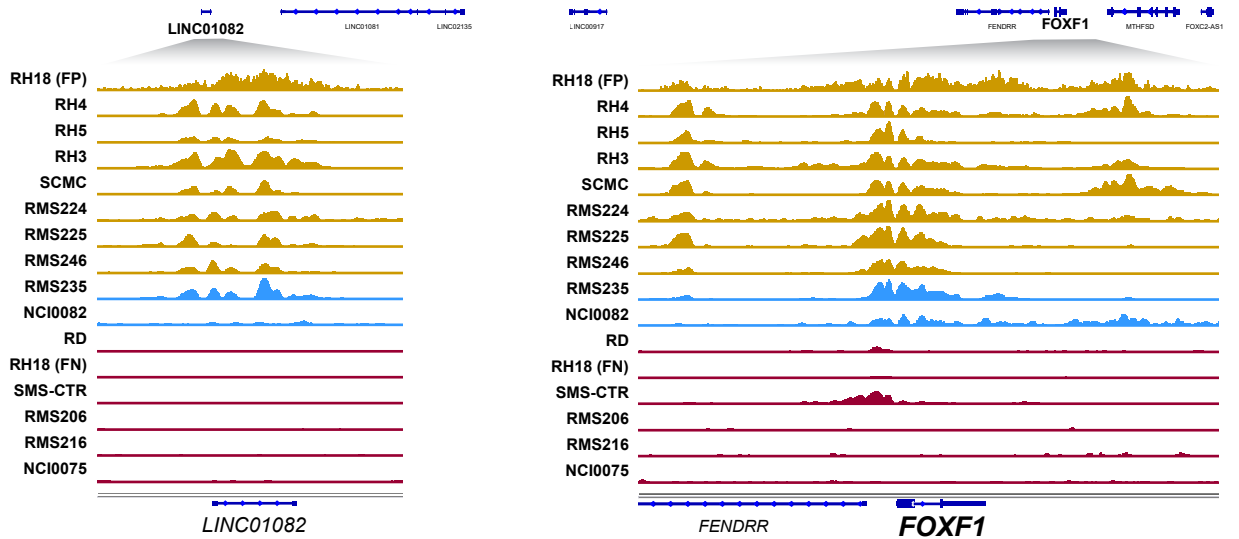

Supplement: NIHMS1669194-supplement-4.pdf [file NIHMS1669194-supplement-4.pdf]

(A)

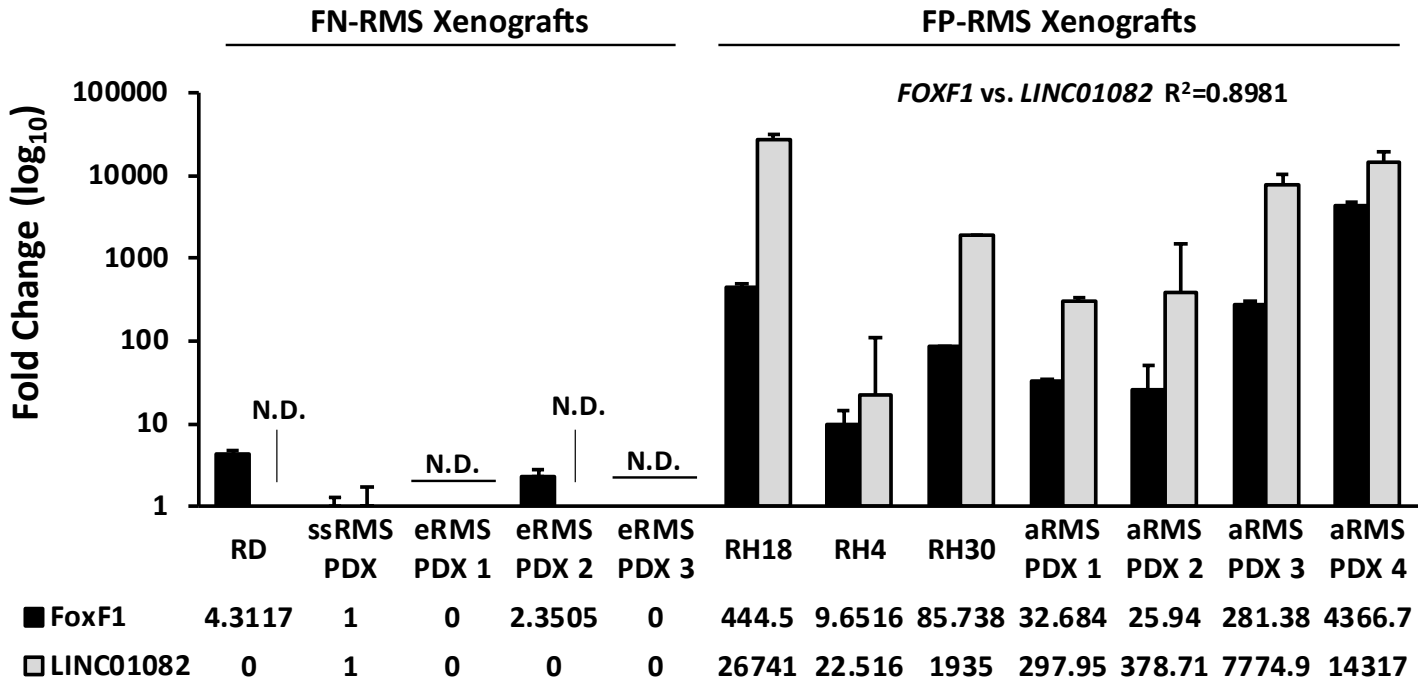

(B)

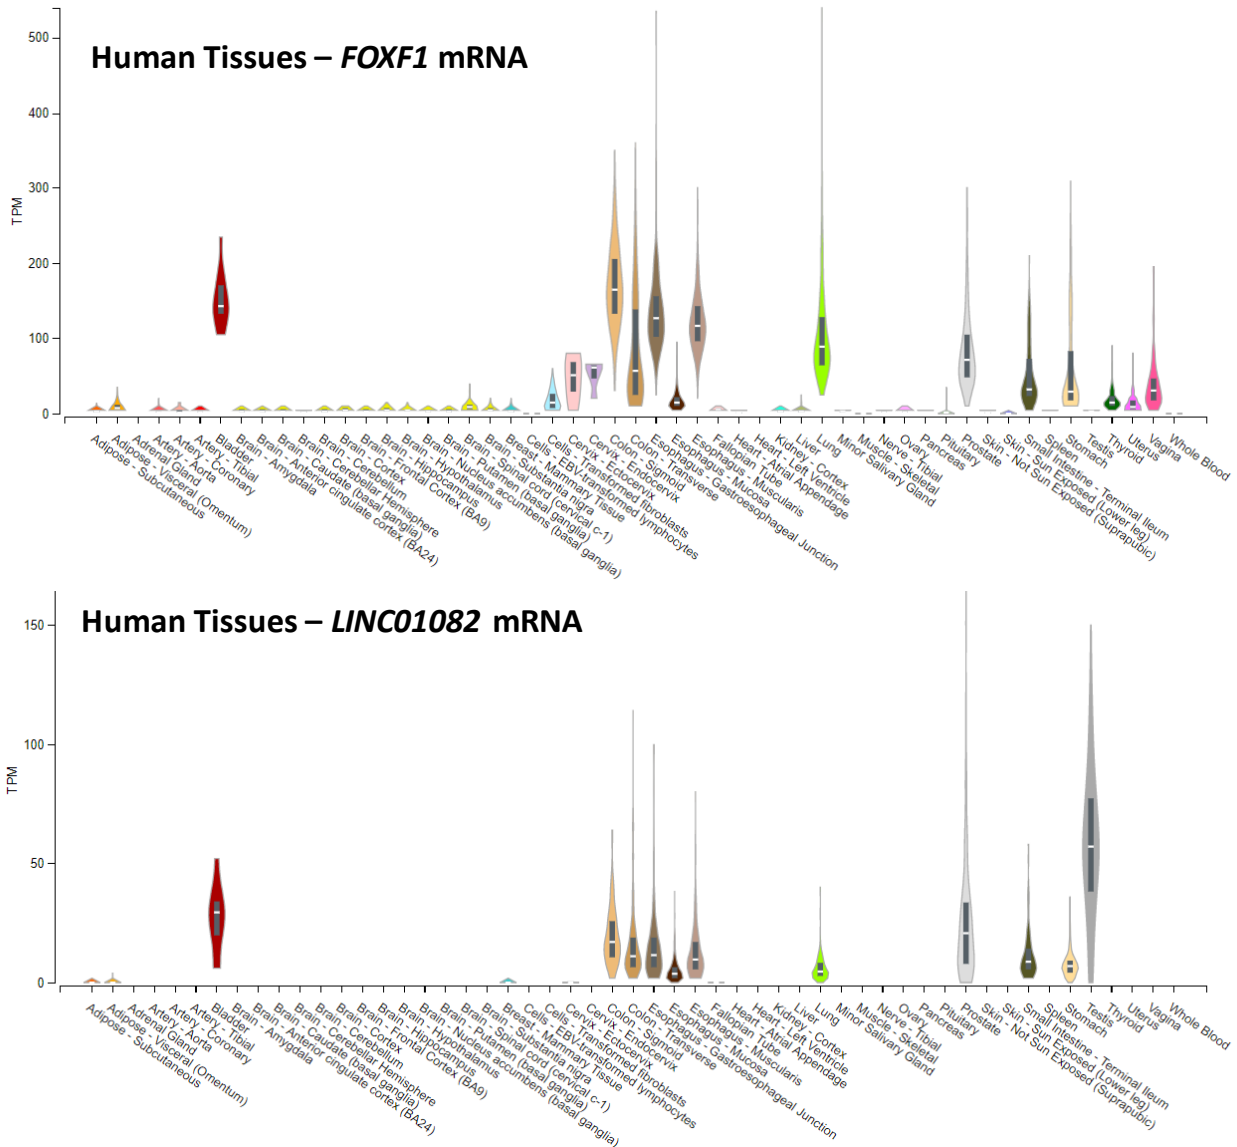

Supplement: NIHMS1669194-supplement-6.pdf [file NIHMS1669194-supplement-6.pdf]

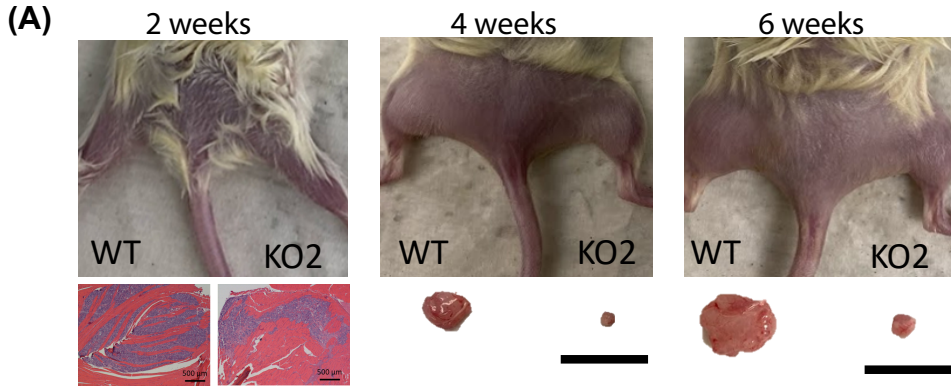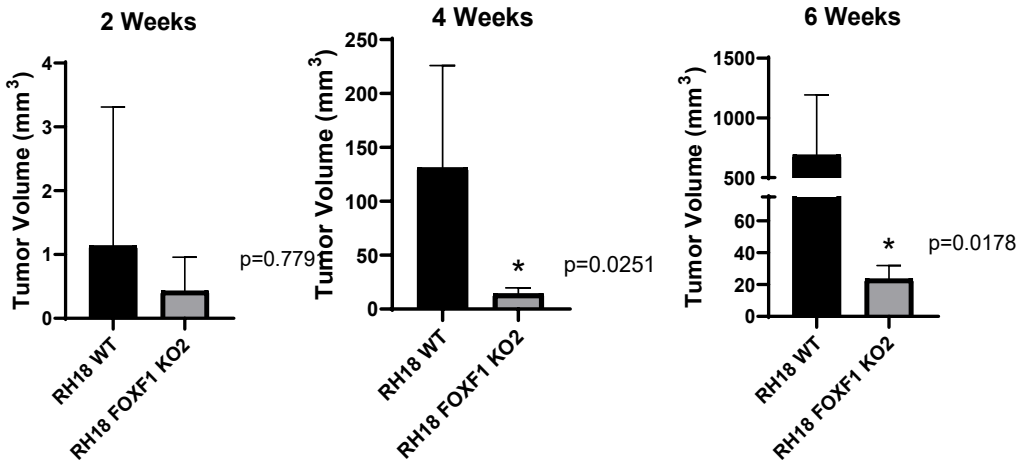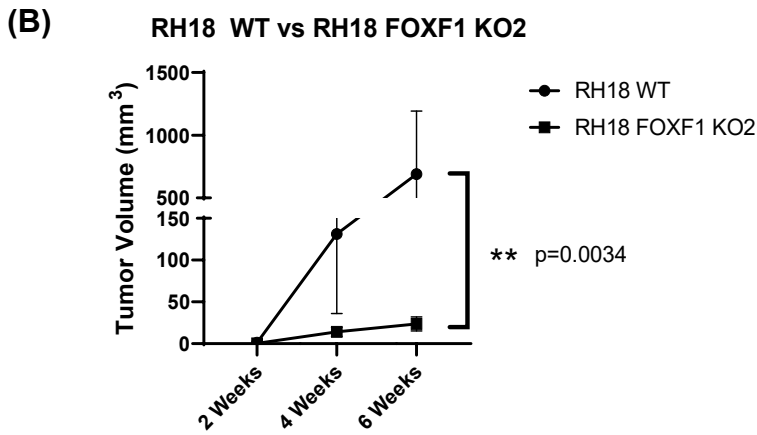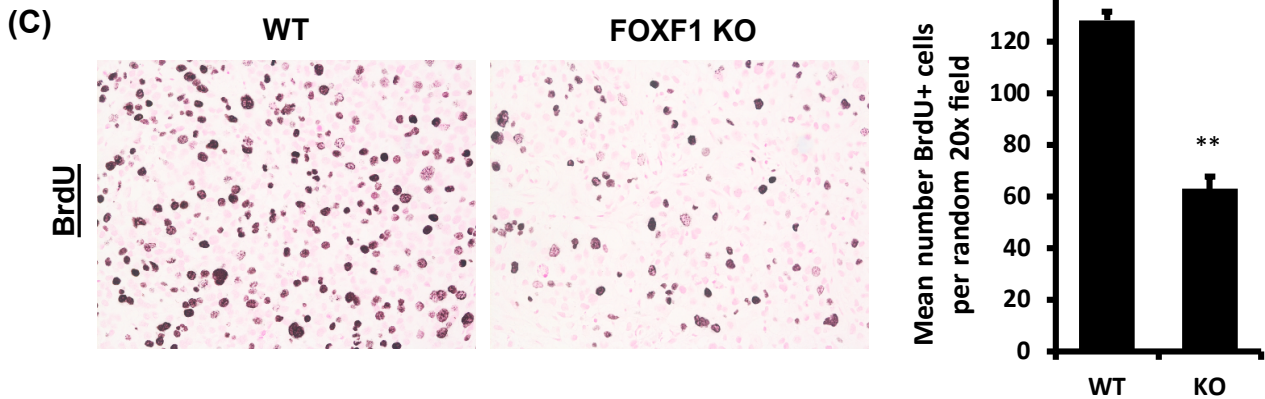

Supplement: NIHMS1669194-supplement-8.pdf [file NIHMS1669194-supplement-8.pdf]

# Milewski et al Supplemental Figure S8

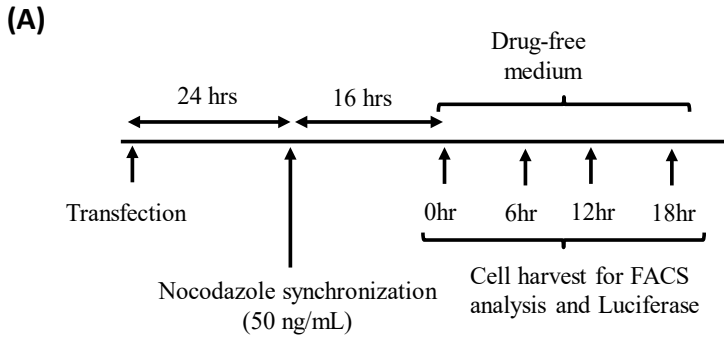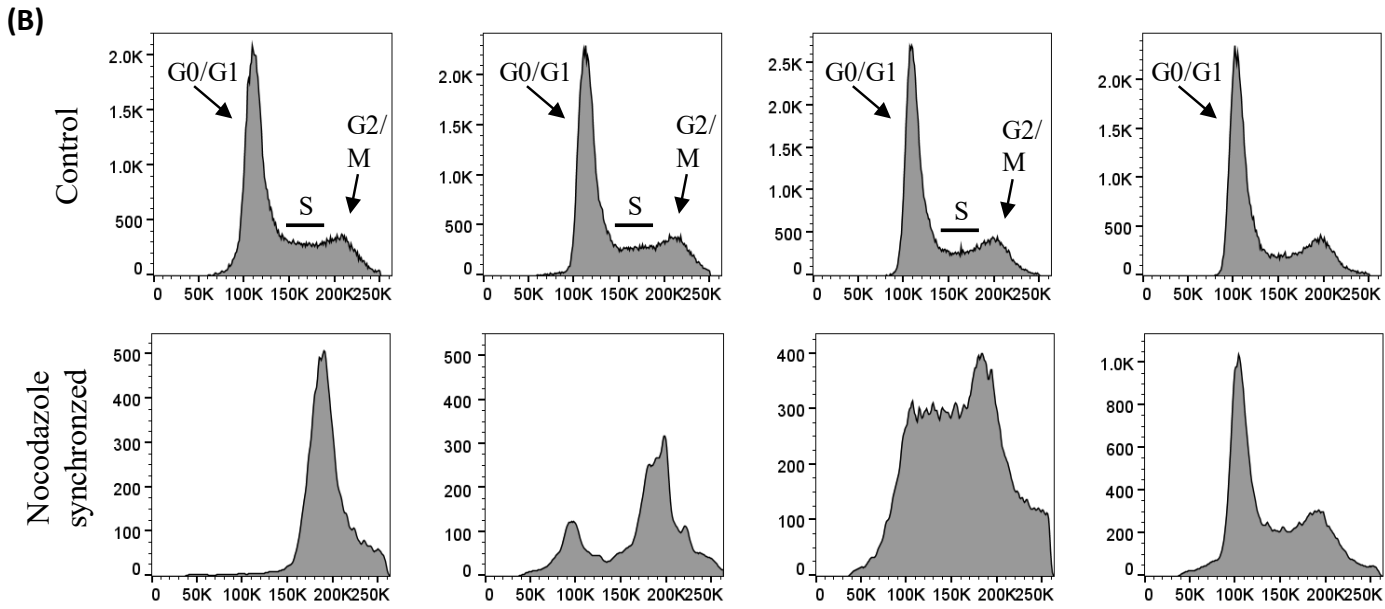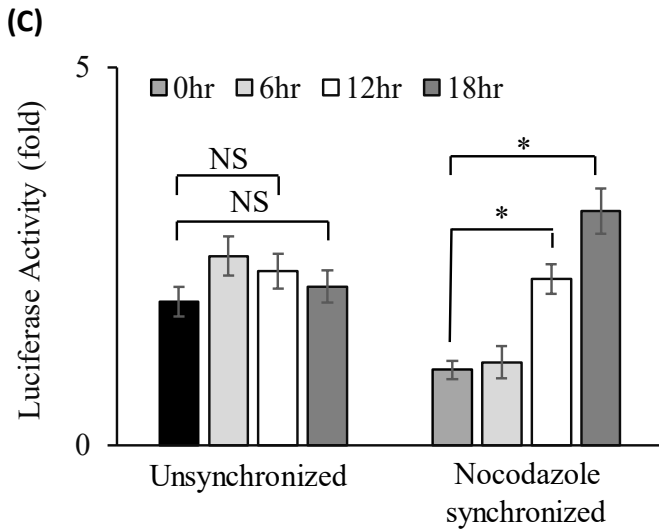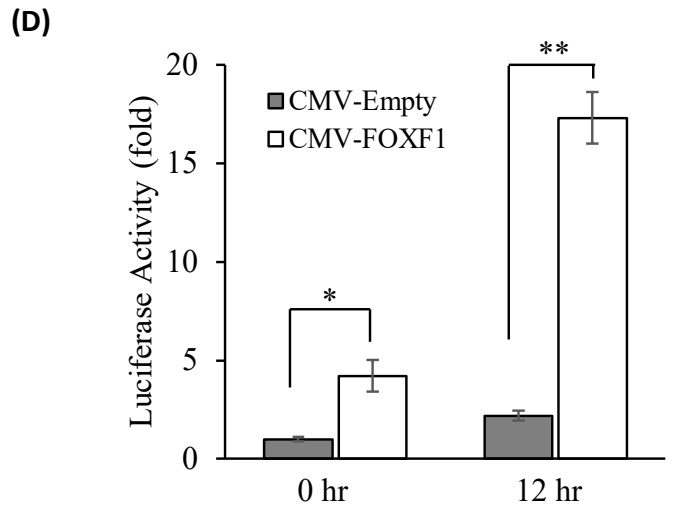

Supplement: NIHMS1669194-supplement-9.pdf [file NIHMS1669194-supplement-9.pdf]
